# Supplementary material for: The TLR4 adaptor TRAM controls the phagocytosis of Gram-negative bacteria by interacting with the Rab11-family interacting protein 2
Source: PLoS Pathog. 2019 Mar 18;15(3):e1007684. doi: 10.1371/journal.ppat.1007684 (PMC6438586; doi:10.1371/journal.ppat.1007684)
Supplement: S2 Table — (XLSX) [file ppat.1007684.s011.xlsx]

## Sheet: E. coli 2h FIP2 siRNA - NS RNA
NCBI RefSeq	logFC	Average Expr	Adj. P Value	Gene name
NM_002416.1	-2.22228	5.46874	0.000488579	CXCL9
NM_000575.3	-1.7627	6.00425	0.00535857	IL1A
NM_002621.2	-1.7096	2.75427	0.00109932	CFP
NM_006120.3	-1.63522	10.4984	3.0453e-15	HLA-DMA
NM_002187.2	-1.61427	6.22532	0.0376426	IL12B
NM_000634.2	-1.61139	3.38306	0.0167419	CXCR1
NM_002176.2	-1.53133	7.30173	0.00897297	IFNB1
NM_001511.1	-1.5267	8.94591	0.00516297	CXCL1
NM_000952.3	-1.48622	7.81462	5.47495e-06	PTAFR
NM_013252.2	-1.46541	4.59575	0.00189264	CLEC5A
NM_005810.3	-1.29753	3.19793	0.000488579	KLRG1
NM_000576.2	-1.21954	9.90361	0.0346371	IL1B
NM_012340.3	-1.21564	4.7909	0.000600445	NFATC2
NM_001002273.1	-1.19824	8.04753	0.0182344	FCGR2B
NM_004951.3	-1.19681	10.8563	0.000471845	GPR183
NM_018644.3	-1.13478	1.10063	0.253883	B3GAT1
NM_001081442.1	-1.09727	3.70773	0.0280109	LILRB5
NM_000758.2	-1.05595	5.20074	0.152138	CSF2
NM_181310.1	-1.03939	2.40908	0.0183963	IL22RA2
NM_000963.1	-0.996222	9.33054	0.0651834	PTGS2
NM_005409.4	-0.98577	7.38	0.0651834	CXCL11
NM_001763.2	-0.980954	3.99121	0.0149968	CD1A
NM_000570.4	-0.955113	9.82309	0.00249471	FCGR3B
NM_000358.2	-0.947986	9.72226	0.00547839	TGFBI
NM_003991.2	-0.944592	1.49047	0.113468	EDNRB
NM_000616.4	-0.938613	9.11515	7.88318e-05	CD4
NM_000885.4	-0.935198	5.36818	0.00104771	ITGA4
NM_020661.1	-0.931515	3.73435	0.116405	AICDA
NM_002658.2	-0.896918	7.81445	0.000997463	PLAU
NM_006770.3	-0.889358	6.83891	0.0786618	MARCO
NM_004244.4	-0.888667	9.50082	0.00516297	CD163
NM_002001.2	-0.879759	2.6164	0.0509528	FCER1A
NM_002982.3	-0.852548	8.61822	0.0874762	CCL2
NM_000210.1	-0.835232	7.91756	0.00194725	ITGA6
NM_015991.2	-0.834053	9.94273	0.0376426	C1QA
NM_181879.2	-0.833516	8.75765	0.0167419	LILRA5
NM_001175.4	-0.83213	11.3837	0.0015536	ARHGDIB
NM_003745.1	-0.822838	8.20803	0.000488579	SOCS1
NM_002438.2	-0.82119	8.44279	0.00564416	MRC1
NM_201563.4	-0.817829	9.37778	0.00541485	FCGR2C
NM_003955.3	-0.811241	8.44984	0.0422282	SOCS3
NM_000594.2	-0.804765	11.5397	0.172978	TNF
NM_004513.4	-0.803429	6.30584	0.000488579	IL16
NM_003839.2	-0.792511	7.02786	0.00200889	TNFRSF11A
NM_181657.3	-0.790529	6.55585	0.0520654	LTB4R
NM_000582.2	-0.788597	14.6926	0.0217894	SPP1
NM_212482.1	-0.78394	12.3092	0.00200287	FN1
NM_000591.2	-0.779609	9.60187	0.0608565	CD14
NM_004345.3	-0.772408	6.73345	0.119108	CAMP
NM_145898.1	-0.770477	6.01046	0.0089644	CCL23
NM_001204344.1	-0.763819	9.24265	0.0387269	TNFSF15
NM_001565.1	-0.754605	8.07979	0.298629	CXCL10
NM_033016.2	-0.752601	7.05965	0.0185538	PDGFB
NM_002046.3	-0.750423	12.4115	0.00109932	GAPDH
NM_002984.2	-0.745971	12.7426	0.180399	CCL4
NM_000882.2	-0.731039	5.39117	0.134766	IL12A
NM_021642.3	-0.717651	8.31582	0.0225988	FCGR2A
NM_002983.2	-0.699195	13.21	0.0911364	CCL3
NM_005658.3	-0.696171	9.54918	0.115313	TRAF1
NM_016584.2	-0.6818	8.26536	0.390169	IL23A
NM_002089.3	-0.678738	9.8511	0.368161	CXCL2
NM_000611.4	-0.670171	11.2725	0.00115255	CD59
NM_198282.1	-0.668574	6.25849	0.00868363	TMEM173
NM_000902.2	-0.663331	8.32069	0.114744	MME
NM_005201.2	-0.6502	1.53512	0.227371	CCR8
NM_001795.3	-0.633163	1.26314	0.389745	CDH5
NM_000958.2	-0.632815	8.10671	0.0606775	PTGER4
NM_000579.1	-0.628851	7.70776	0.0014757	CCR5
NM_005211.2	-0.625001	6.89894	0.00739221	CSF1R
NM_006273.2	-0.592825	6.9232	0.114949	CCL7
NM_013371.3	-0.591771	1.16961	0.331537	IL19
NM_001079821.2	-0.590063	7.74539	0.15873	NLRP3
NM_005442.2	-0.588053	2.24171	0.113468	EOMES
NM_145659.3	-0.583503	6.85827	0.173262	IL27
NM_000584.2	-0.576447	11.067	0.339096	CXCL8
NM_000572.2	-0.573783	8.26281	0.234988	IL10
NM_001005474.1	-0.571974	9.57253	0.27627	NFKBIZ
NM_001001548.2	-0.566329	13.291	0.00638519	CD36
NM_000175.2	-0.565082	10.0065	0.0112009	GPI
NM_002965.2	-0.554752	11.112	0.156113	S100A9
NM_000600.1	-0.552211	7.86726	0.390169	IL6
NM_001558.2	-0.527556	11.2218	0.00547839	IL10RA
NM_000586.2	-0.522093	2.14719	0.389745	IL2
NM_000632.3	-0.51756	10.666	0.00667508	ITGAM
NM_006288.2	-0.492288	0.925816	0.426462	THY1
NM_002526.2	-0.483087	2.63951	0.368161	NT5E
NM_194448.2	-0.479958	7.68243	0.150159	CLEC4A
NM_016232.4	-0.479896	2.29451	0.279238	IL1RL1
NM_021602.2	-0.473134	3.53628	0.389745	CD79B
NM_001769.2	-0.46976	11.7122	0.0471301	CD9
NM_000927.3	-0.467471	3.55284	0.14058	ABCB1
NM_000657.2	-0.462808	7.24852	0.0250382	BCL2
NM_003202.2	-0.461822	5.32471	0.286451	TCF7
NM_020529.1	-0.456667	12.8816	0.220427	NFKBIA
NM_173343.1	-0.449997	5.99367	0.0489778	IL1R2
NM_002445.3	-0.448602	11.83	0.0579191	MSR1
NM_001198.3	-0.438089	8.4305	0.107896	PRDM1
NM_139011.2	-0.438007	4.75337	0.0338587	HFE
NM_002991.2	-0.43469	4.05707	0.343607	CCL24
NM_002205.2	-0.432981	10.3592	0.0182344	ITGA5
NM_178014.2	-0.426197	9.53369	0.0785809	TUBB
NM_001831.2	-0.420782	2.40537	0.237116	CLU
NM_002037.3	-0.419602	7.26786	0.0167419	FYN
NM_004152.2	-0.410631	12.2898	0.134766	OAZ1
NM_002415.1	-0.408932	9.10117	0.0444254	MIF
NM_000242.2	-0.403257	1.94488	0.463227	MBL2
NM_000590.1	-0.400141	2.44489	0.458487	IL9
NM_021155.2	-0.396156	5.82836	0.130335	CD209
NM_000417.1	-0.388926	4.16695	0.397332	IL2RA
NM_002964.3	-0.387853	6.91954	0.385044	S100A8
NM_000887.3	-0.385991	12.7696	0.0338587	ITGAX
NM_001081551.2	-0.38145	3.17903	0.37074	DEFB103A
NM_181780.2	-0.379029	2.91607	0.378222	BTLA
NM_004106.1	-0.378109	13.2562	0.0156221	FCER1G
NM_006516.2	-0.375751	3.63194	0.261549	SLC2A1
NM_004931.3	-0.371903	3.44424	0.382757	CD8B
NM_172140.1	-0.370534	5.82156	0.639147	IFNL1
NM_001081637.1	-0.369299	7.40604	0.368161	LILRB1
NM_000879.2	-0.36673	2.51881	0.430454	IL5
NM_001964.2	-0.366237	5.68076	0.659414	EGR1
NM_052945.3	-0.362099	2.19413	0.482104	TNFRSF13C
NM_139125.3	-0.355528	1.85077	0.390169	MASP1
NM_000876.1	-0.348679	10.6097	0.12189	IGF2R
NM_000442.3	-0.34841	10.5406	0.0393904	PECAM1
NM_003234.1	-0.348107	12.174	0.218146	TFRC
NM_001547.4	-0.345432	11.8116	0.574172	IFIT2
NM_002258.2	-0.343011	3.3187	0.389745	KLRB1
NM_000566.3	-0.335526	4.26734	0.310542	FCGR1A
NM_001404.4	-0.334199	11.3828	0.0387032	EEF1G
NM_024318.2	-0.332388	8.56097	0.343488	LILRA6
NM_001561.4	-0.331866	7.52723	0.202276	TNFRSF9
NM_000407.4	-0.331469	2.44003	0.388769	GP1BB
NM_006290.2	-0.33107	11.2658	0.397332	TNFAIP3
NM_001935.3	-0.330067	9.18434	0.378222	DPP4
NM_003268.3	-0.327253	5.21668	0.133074	TLR5
NM_000565.2	-0.324325	8.6775	0.0587533	IL6R
NM_001767.3	-0.322034	3.34013	0.506725	CD2
NM_001557.2	-0.321765	5.11479	0.417837	CXCR2
NM_001123041.2	-0.316928	1.97029	0.525821	CCR2
NM_002287.3	-0.312944	9.30962	0.152133	LAIR1
NM_000757.4	-0.311344	9.23131	0.665694	CSF1
NM_014512.1	-0.310543	1.99921	0.590128	KIR2DS1
NM_013351.1	-0.310039	6.17546	0.334748	TBX21
NM_012276.3	-0.309902	2.10111	0.615368	LILRA4
NM_002163.2	-0.308657	10.1296	0.193772	IRF8
NM_002208.4	-0.30793	8.8869	0.165439	ITGAE
NM_002121.4	-0.306252	10.3601	0.293616	HLA-DPB1
NM_000491.3	-0.303121	11.0499	0.495864	C1QB
NM_000402.2	-0.289904	10.5409	0.480165	G6PD
NM_000206.1	-0.285039	10.7238	0.0923829	IL2RG
NM_138957.2	-0.284231	9.33123	0.019259	MAPK1
NM_000629.2	-0.283411	7.03815	0.158843	IFNAR1
NM_003189.2	-0.280076	1.62286	0.515714	TAL1
NM_001242.4	-0.279488	2.58077	0.572899	CD27
NM_001531.2	-0.274159	6.8513	0.166407	MR1
NM_003199.1	-0.273369	6.1718	0.370016	TCF4
NM_002260.3	-0.272405	1.64581	0.760316	KLRC2
NM_001006658.1	-0.271172	2.21016	0.633627	CR2
NM_001136031.2	-0.267726	8.76023	0.136766	ATG7
NM_000606.2	-0.265526	3.94668	0.574362	C8G
NM_001754.4	-0.263115	6.10937	0.190601	RUNX1
NM_001760.2	-0.25995	9.09299	0.209017	CCND3
NM_001098629	-0.257635	8.68241	0.397332	IRF5
NM_021803.2	-0.256741	2.30229	0.616468	IL21
NM_000651.4	-0.254523	6.13008	0.515714	CR1
NM_016382.2	-0.249703	5.27093	0.399509	CD244
NM_001128128.1	-0.24943	4.22352	0.368161	ZEB1
NM_000589.2	-0.246803	1.44499	0.776063	IL4
NM_014009.3	-0.246582	2.52816	0.546042	FOXP3
NM_000397.3	-0.242472	11.3576	0.165439	CYBB
NM_015967.4	-0.240799	7.45499	0.424075	PTPN22
NM_004590.2	-0.240361	1.20633	0.735636	CCL16
NM_004862.3	-0.233177	11.903	0.163131	LITAF
NM_001814.4	-0.232803	11.2236	0.343488	CTSC
NM_000246.3	-0.231409	2.57635	0.675889	CIITA
NM_003805.3	-0.228381	5.85604	0.336497	CRADD
NM_002838.4	-0.217883	3.10185	0.748397	PTPRC
NM_004168.1	-0.210411	8.57899	0.740658	SDHA
NM_001570.3	-0.207364	7.87505	0.482104	IRAK2
NM_019014.3	-0.203962	4.84216	0.382757	POLR1B
NM_005745.7	-0.203026	12.3655	0.185677	BCAP31
NM_003006.3	-0.201172	3.49803	0.574172	SELPLG
NM_003998.2	-0.201141	7.47607	0.370016	NFKB1
NM_005565.3	-0.199193	11.6643	0.220419	LCP2
NM_012092.2	-0.197182	2.92721	0.786145	ICOS
NR_029467.1	-0.196062	5.19544	0.776063	SELL
NM_145725.1	-0.188952	8.82746	0.112878	TRAF3
NM_021130.2	-0.184742	6.7015	0.491526	PPIA
NM_006737.2	-0.181665	2.86635	0.63251	KIR3DL2
NM_005384.2	-0.181659	7.65364	0.68362	NFIL3
NM_021805.2	-0.181352	5.47866	0.415636	SIGIRR
NM_004131.3	-0.179602	3.83808	0.732865	GZMB
NM_000204.3	-0.174946	2.59966	0.6958	CFI
NM_025239.3	-0.172615	7.79094	0.506725	PDCD1LG2
NM_001771.2	-0.170812	8.22654	0.378222	CD22
NM_001131028.1	-0.168614	7.16495	0.760188	ATG10
NM_172389.1	-0.168004	8.25647	0.574362	NFATC1
NM_014207.2	-0.166558	3.17028	0.771086	CD5
NM_004295.2	-0.164052	6.11225	0.525937	TRAF4
NM_006144.2	-0.163308	4.17808	0.741669	GZMA
NM_006863.1	-0.161119	3.69132	0.737192	LILRA1
NM_052813.4	-0.161054	5.4006	0.541243	CARD9
NM_005356.2	-0.159273	3.42152	0.786145	LCK
NM_002990.3	-0.159174	13.3795	0.786955	CCL22
NM_018661.3	-0.154249	2.18067	0.748397	DEFB103B
NM_002259.3	-0.153134	2.09071	0.841246	KLRC1
NM_001244.3	-0.149723	6.98149	0.645543	TNFSF8
NM_004555.2	-0.146085	7.47748	0.583157	NFATC3
NM_033554.2	-0.145287	11.2226	0.574172	HLA-DPA1
NM_002104.2	-0.145123	3.44963	0.776063	GZMK
NM_001078.3	-0.142996	3.74722	0.844172	VCAM1
NM_005191.3	-0.138945	7.80978	0.709433	CD80
NM_002751.5	-0.135387	3.34823	0.736398	MAPK11
NM_005535.1	-0.13429	4.98934	0.642609	IL12RB1
NM_000211.2	-0.133148	12.861	0.521656	ITGB2
NM_000891.2	-0.130048	6.40565	0.848646	KCNJ2
NM_001001392.1	-0.129493	12.1128	0.59075	CD44
NM_002309.3	-0.128205	8.36233	0.843615	LIF
NM_001562.2	-0.126228	9.98707	0.741669	IL18
NM_000733.2	-0.123844	3.76442	0.843615	CD3E
NM_005263.2	-0.122472	3.86903	0.773841	GFI1
NM_001040033.1	-0.113311	11.9965	0.844172	CD53
NM_002996.3	-0.111606	2.9271	0.868818	CX3CL1
NM_005417.3	-0.10636	9.94105	0.715484	SRC
NM_003177.3	-0.105686	9.53556	0.636211	SYK
NM_017625.2	-0.105617	2.52755	0.866897	ITLN1
NM_002182.2	-0.105493	5.81135	0.665694	IL1RAP
NM_000874.3	-0.103755	9.63695	0.506725	IFNAR2
NM_003326.2	-0.103279	5.23008	0.699049	TNFSF4
NM_004591.1	-0.0995406	10.6311	0.891707	CCL20
NM_006060.3	-0.0971701	6.51335	0.643426	IKZF1
NM_001002295.1	-0.0962782	2.57302	0.859127	GATA3
NM_004334.2	-0.0957731	8.1381	0.622803	BST1
NM_001081551	-0.0936853	7.03671	0.809272	DEFB103A
NM_000615.5	-0.090699	3.60964	0.853561	NCAM1
NM_000595.2	-0.0906713	4.60305	0.853755	LTA
NM_000587.2	-0.0896853	1.49917	0.891707	C7
NM_000419.3	-0.0885545	1.77551	0.917342	ITGA2B
NM_152866.2	-0.086557	2.84133	0.906595	MS4A1
NM_006072.4	-0.0800803	1.8669	0.88296	CCL26
NM_001079.3	-0.0797889	4.06247	0.855603	ZAP70
NM_005408.2	-0.0779634	2.54002	0.887524	CCL13
NM_000201.2	-0.0772719	11.2322	0.880597	ICAM1
NM_014589.1	-0.0732448	3.19245	0.887524	PLA2G2E
NM_001081438.1	-0.072937	11.3864	0.821451	LILRB4
NM_172350.1	-0.0718933	9.94386	0.611811	CD46
NM_015089.2	-0.0707917	5.82915	0.748397	CUL9
NM_002414.3	-0.0705941	12.0914	0.688715	CD99
NM_000065.2	-0.0692226	4.6871	0.887524	C6
NM_002053.1	-0.0676594	10.0804	0.884236	GBP1
NM_007293.2	-0.0655664	3.98317	0.887524	C4A
NM_000715.3	-0.0652187	5.56008	0.964332	C4BPA
NM_021960.3	-0.0645937	10.927	0.78141	MCL1
NM_014143.3	-0.062151	9.85821	0.874576	CD274
NM_000061.1	-0.0610423	8.49263	0.740658	BTK
NM_002231.3	-0.0605418	9.60445	0.796885	CD82
NM_004107.4	-0.0595876	11.6507	0.808239	FCGRT
NM_003259.3	-0.0564576	2.75403	0.903754	ICAM5
NM_002483.4	-0.0563464	2.77878	0.887524	CEACAM6
NM_001768.5	-0.0551298	4.59075	0.910318	CD8A
NM_004829.5	-0.0535559	2.31288	0.93787	NCR1
NM_001025109.1	-0.0532967	2.0133	0.929192	CD34
NM_002123.3	-0.0523205	5.85179	0.971761	HLA-DQB1
NM_021798.2	-0.0523157	5.53425	0.909278	IL21R
NM_019111.3	-0.0520633	12.3308	0.88296	HLA-DRA
NM_004335.2	-0.050937	10.111	0.891707	BST2
NM_002124.2	-0.0506405	7.63241	0.970803	HLA-DRB1
NM_000638.3	-0.0503521	1.70438	0.935404	VTN
NM_016269.3	-0.0495507	4.10756	0.931608	LEF1
NM_007360.1	-0.0494838	3.47183	0.941321	KLRK1
NM_006137.6	-0.0476789	4.07732	0.945531	CD7
NM_000194.1	-0.0475069	8.41885	0.843615	HPRT1
NM_003264.3	-0.0471296	7.79456	0.887524	TLR2
NM_000732.4	-0.0470087	3.95005	0.935404	CD3D
NM_032982.2	-0.0434633	6.82924	0.861097	CASP2
NM_013258.3	-0.0426015	7.36106	0.887524	PYCARD
NM_002185.2	-0.041548	6.93782	0.935404	IL7R
NM_001024847.1	-0.0409767	9.19253	0.843615	TGFBR2
NM_001569.3	-0.0400604	9.59017	0.825713	IRAK1
NM_001130725.1	-0.0381426	9.78137	0.887524	PSMB5
NM_001212.3	-0.0354507	8.94069	0.931608	C1QBP
NM_006865.3	-0.0352581	9.95048	0.941321	LILRA3
NM_003152.2	-0.0346883	9.17347	0.887524	STAT5A
NM_005080.2	-0.034308	9.5325	0.920077	XBP1
NM_004233.3	-0.032173	12.5805	0.891472	CD83
NM_005874.1	-0.0320988	8.53653	0.920077	LILRB2
NM_001145775.1	-0.0299664	7.67116	0.888286	FKBP5
NM_006864.2	-0.0299145	7.43945	0.920077	LILRB3
NM_004759.3	-0.0297094	9.39563	0.901076	MAPKAPK2
NM_019009.2	-0.0296018	8.73571	0.941321	TOLLIP
NM_003809.2	-0.0270513	8.37827	0.887524	TNFSF12
NM_002704.2	-0.0244063	2.42834	0.964332	PPBP
NM_006274.2	-0.0235667	3.81396	0.964332	CCL19
NM_001252.2	-0.0233599	5.3836	0.965546	CD70
NM_001621.3	-0.0221365	9.43254	0.931608	AHR
NM_001560.2	-0.0191152	9.60154	0.911826	IL13RA1
NM_024013.1	-0.0147127	3.52711	0.972294	IFNA1
NM_001250.4	-0.0143313	10.8816	0.964332	CD40
NM_000043.3	-0.0137057	5.5318	0.967421	FAS
NM_019839.4	-0.0105932	4.05035	0.981643	LTB4R2
NM_198053.1	-0.00377393	3.50482	0.997767	CD247
NM_057158.2	-0.00343678	4.92509	0.997767	DUSP4
NM_017442.2	-0.00193661	2.6887	0.997767	TLR9
NM_006399.3	-0.00156132	5.44497	0.997767	BATF
NM_004079.3	-0.000568013	15.151	0.997767	CTSS
NM_001278.3	-0.000439952	8.44735	0.998194	CHUK
NM_138554.2	0.00102753	9.7006	0.997767	TLR4
NM_002122.3	0.00227717	7.67849	0.998194	HLA-DQA1
NM_001779.2	0.00279425	9.80926	0.989566	CD58
NM_002986.2	0.0068799	2.37669	0.989566	CCL11
NM_000937.2	0.007723	9.17576	0.96598	POLR2A
NM_000045.2	0.00831942	3.12885	0.986196	ARG1
NM_001190765.1	0.00969527	2.42257	0.986196	KLRF2
NM_001223.3	0.0162769	8.9462	0.964332	CASP1
NM_001504.1	0.020431	3.51436	0.954862	CXCR3
NM_004579.2	0.0262132	8.15986	0.903754	MAP4K2
NM_001014975.2	0.0296035	3.15301	0.964332	CFH
NM_002198.1	0.0297862	9.49605	0.941321	IRF1
NM_013230.2	0.0299635	3.63077	0.943315	CD24
NM_002502.2	0.0324638	9.80232	0.897171	NFKB2
NM_004834.3	0.0344915	10.0125	0.910318	MAP4K4
NM_052872.3	0.0364844	2.67756	0.931608	IL17F
NM_005218.3	0.0394704	3.01615	0.920077	DEFB1
NM_016562.3	0.039608	4.74017	0.932277	TLR7
NM_001315.1	0.0404315	9.03132	0.852822	MAPK14
NM_144781.2	0.0410908	7.27727	0.843615	PDCD2
NM_001098210.1	0.0413219	11.3331	0.852822	CTNNB1
NM_004159.4	0.0440307	10.3605	0.793479	PSMB8
NM_021175.2	0.0453842	8.99787	0.891707	HAMP
NM_001177388.1	0.0456004	13.4974	0.887524	LGALS3
NM_003965.4	0.0464563	11.9597	0.887524	CCRL2
NM_001184714.1	0.0474022	4.87256	0.887524	SLAMF6
NM_001012633.1	0.0480978	9.93866	0.910318	IL32
NM_013289.2	0.0483285	2.121	0.931608	KIR3DL1
NM_000577.3	0.0577316	12.998	0.887524	IL1RN
NM_000066.2	0.0581043	2.46189	0.891707	C8B
NM_003467.2	0.0595846	9.51993	0.874576	CXCR4
NM_004707.2	0.0625947	5.16187	0.845737	ATG12
NM_001243078.1	0.0636483	3.50403	0.903754	CD28
NM_000631.4	0.0638698	8.12074	0.843615	NCF4
NM_032782.3	0.0646144	10.5105	0.786145	HAVCR2
NM_016523.1	0.0646601	2.90242	0.897999	KLRF1
NM_012448.3	0.0664534	7.51815	0.747724	STAT5B
NM_198157.1	0.0673135	6.97134	0.727888	UBE2L3
NM_016123.1	0.0687818	6.58589	0.771177	IRAK4
NM_018402.1	0.0691223	2.31415	0.891707	IL26
NR_028045.1	0.0726781	2.56466	0.891707	KLRA1P
NM_006785.2	0.0727595	7.55728	0.690686	MALT1
NM_002385.2	0.0738642	7.5497	0.841246	MBP
NM_000484.3	0.0742525	10.9482	0.675889	APP
NM_022555.3	0.0766682	11.911	0.773841	HLA-DRB3
NM_006006.4	0.0770146	2.11048	0.887524	ZBTB16
NM_000981.3	0.0787143	12.5803	0.624815	RPL19
NM_001083539.1	0.0803763	4.35574	0.850552	KIR3DS1
NM_000181.1	0.081718	11.4005	0.643426	GUSB
NM_002343.2	0.0841293	2.37702	0.888286	LTF
NM_005816.4	0.0847409	4.2616	0.88296	CD96
NM_003841.3	0.0849097	6.71011	0.787164	TNFRSF10C
NM_003701.2	0.0849625	2.63306	0.887524	TNFSF11
NM_002227.1	0.0887029	9.18938	0.536852	JAK1
NM_006254.3	0.0906561	10.5525	0.695061	PRKCD
NM_006725.3	0.0912674	4.5074	0.891707	CD6
NM_001295.2	0.091888	10.5185	0.688715	CCR1
NM_032991.2	0.0924274	8.01575	0.604231	CASP3
NM_000878.2	0.0943132	4.73122	0.843615	IL2RB
NM_000562.2	0.0982853	1.30847	0.887524	C8A
NM_002609.3	0.0988437	2.67903	0.872205	PDGFRB
NM_001928.2	0.0992492	7.29544	0.815157	CFD
NM_031409.2	0.100985	3.37714	0.760316	CCR6
NM_013314.2	0.102634	6.74945	0.651345	BLNK
NM_001296.3	0.105524	2.75234	0.786955	ACKR2
NM_001145805.1	0.107716	2.26481	0.855603	IRGM
NM_080921.2	0.108046	10.9935	0.546042	PTPRC
NM_001037631.1	0.112473	6.01866	0.659414	CTLA4
NM_144701.2	0.113263	3.8978	0.874958	IL23R
NM_002803.3	0.113361	9.88674	0.421279	PSMC2
NM_156038.2	0.113716	8.70563	0.532984	CSF3R
NM_001172.3	0.114029	4.1321	0.757583	ARG2
NM_002995.1	0.117224	1.80723	0.887524	XCL1
NM_001025159.1	0.118055	14.1666	0.691103	CD74
NM_001337.3	0.119414	2.77868	0.845736	CX3CR1
NM_003151.2	0.123613	7.96102	0.776063	STAT4
NM_007333.2	0.124983	2.81958	0.823179	KLRC3
NM_080921.3	0.125422	10.7075	0.414973	PTPRC
NM_001816.3	0.128386	2.12086	0.8372	CEACAM8
NM_033666.2	0.137521	10.7471	0.350778	ITGB1
NM_139208.1	0.138932	2.22793	0.786955	MASP2
NM_005178.2	0.140756	8.25336	0.581378	BCL3
NM_015869.3	0.142475	7.06552	0.659414	PPARG
NM_016039.2	0.142912	9.59481	0.293616	C14orf166
NM_145071.2	0.143018	3.93761	0.757532	CISH
NM_003331.3	0.143905	7.76994	0.251822	TYK2
NM_078481.2	0.14548	10.3975	0.44237	ADGRE5
NM_003921.2	0.146321	9.49212	0.360661	BCL10
NM_005194.2	0.148861	11.0416	0.377872	CEBPB
NM_003820.2	0.148944	9.09159	0.741669	TNFRSF14
NM_020525.4	0.150304	1.93604	0.771177	IL22
NM_004612.2	0.150342	7.74044	0.687455	TGFBR1
NM_000619.2	0.150431	2.58332	0.845737	IFNG
NM_002644.2	0.153554	2.3243	0.786955	PIGR
NM_002209.2	0.154393	8.95878	0.515714	ITGAL
NM_000389.2	0.156215	11.2643	0.414491	CDKN1A
NM_001196.2	0.156722	7.1539	0.477185	BID
NM_147162.1	0.157093	4.08092	0.659414	IL11RA
NM_172174.1	0.158083	6.19669	0.575615	IL15
NM_004942.2	0.16051	2.95705	0.740658	DEFB4A
NM_002698.2	0.161184	4.77942	0.532984	POU2F2
NM_054114.3	0.162962	7.99768	0.677987	TAGAP
NM_003153.3	0.163556	10.3546	0.205882	STAT6
NM_133280.1	0.163675	2.60942	0.760188	FCAR
NM_014002.2	0.164456	9.00411	0.389745	IKBKE
NM_000574.3	0.165205	4.95247	0.52114	CD55
NM_172139.2	0.166139	2.29222	0.748048	IFNL3
NM_005903.5	0.167083	6.02622	0.533059	SMAD5
NM_014261.1	0.167821	8.45894	0.368161	TICAM1
NM_022168.2	0.17341	9.89448	0.522766	IFIH1
NM_013431.2	0.177439	3.19674	0.616468	KLRC4
NM_003190.4	0.181498	11.4525	0.158843	TAPBP
NM_014443.2	0.181653	1.84754	0.821451	IL17B
NM_005238.3	0.18206	5.40666	0.675889	ETS1
NM_002799.2	0.186604	10.3106	0.130335	PSMB7
NM_006433.2	0.18753	4.62998	0.635272	GNLY
NM_001024736.1	0.191155	11.9616	0.218146	CD276
NM_003824.2	0.194611	5.02762	0.390169	FADD
NM_052942.3	0.196091	8.36724	0.622923	GBP5
NM_024408.3	0.196832	10.3061	0.193772	NOTCH2
NM_000609.5	0.197448	3.29275	0.675889	CXCL12
NM_005343.2	0.201494	5.88578	0.397332	HRAS
NM_007053.2	0.203102	2.34081	0.675889	CD160
NM_002468.3	0.205012	11.1513	0.243545	MYD88
NM_001137673.1	0.209052	9.14673	0.111017	ILF3
NM_138761.3	0.216411	10.5753	0.0367099	BAX
NM_006866.2	0.218207	10.9157	0.35608	LILRA2
NM_001039132.1	0.221681	5.92326	0.389745	ICAM4
NM_004072.1	0.222103	8.32881	0.540844	CMKLR1
NM_001192.2	0.224276	2.76558	0.618267	TNFRSF17
NM_139276.2	0.227029	9.7438	0.0873858	STAT3
NM_001005376.1	0.227535	10.8974	0.146052	PLAUR
NM_000074.2	0.231738	2.40934	0.644277	CD40LG
NM_032977.3	0.233121	4.14784	0.533059	CASP10
NM_003639.2	0.234595	7.68938	0.0754059	IKBKG
NM_001706.2	0.236122	9.06877	0.133074	BCL6
NM_003037.2	0.238109	5.82152	0.689519	SLAMF1
NM_003263.3	0.240818	8.83676	0.291171	TLR1
NM_016260.2	0.243791	4.5304	0.500483	IKZF2
NM_003854.2	0.24492	3.1284	0.527377	IL1RL2
NM_001712.3	0.244937	2.2553	0.654363	CEACAM1
NM_000051.3	0.24538	2.61493	0.482104	ATM
NM_002811.3	0.249795	9.85347	0.013086	PSMD7
NM_002801.2	0.251405	9.48768	0.0489669	PSMB10
NM_014511.3	0.252915	2.70852	0.392001	KIR2DL3
NM_005607.3	0.254218	6.88753	0.126856	PTK2
NM_001571.5	0.257702	6.00204	0.0967985	IRF3
NM_003853.2	0.25871	4.88394	0.882315	IL18RAP
NM_014218.2	0.261847	2.60352	0.645543	KIR2DL1
NM_000546.2	0.264989	8.32964	0.113468	TP53
NM_001001523.1	0.265254	3.1715	0.527377	RORC
NM_017617.3	0.265742	5.01022	0.248037	NOTCH1
NM_005902.3	0.269118	5.55596	0.380742	SMAD3
NM_002184.2	0.271939	9.02325	0.166407	IL6ST
NM_000022.2	0.272011	8.54893	0.397332	ADA
NM_004048.2	0.272446	16.7339	0.0484715	B2M
NM_145803.1	0.285884	7.02249	0.0785809	TRAF6
NM_001172085.1	0.288333	6.91993	0.0384226	TBP
NM_013254.2	0.289276	8.58449	0.0977862	TBK1
NM_004849.2	0.29004	8.22737	0.369927	ATG5
NM_002120.3	0.291001	4.36562	0.482104	HLA-DOB
NM_003036.2	0.291443	6.34119	0.133074	SKI
NM_198508.2	0.295224	3.35733	0.334748	KLRG2
NM_002262.3	0.297985	3.287	0.546042	KLRD1
NM_022162.1	0.300359	6.41992	0.243742	NOD2
NM_197954.2	0.301847	7.21732	0.399509	CLEC7A
NM_012099.1	0.302684	3.73694	0.464373	CD3EAP
NM_015364.2	0.303513	11.421	0.0770332	LY96
NM_000873.3	0.306498	6.45655	0.368161	ICAM2
NM_000605.3	0.310496	1.92837	0.527377	IFNA2
NM_007181.3	0.311973	4.361	0.319109	MAP4K1
NM_175862.3	0.314544	9.15779	0.170487	CD86
NM_183232.2	0.318911	3.07536	0.601128	IKZF3
NM_004972.2	0.319423	9.07255	0.0324608	JAK2
NM_007199.1	0.322571	5.47057	0.0498511	IRAK3
NM_001556.1	0.323001	7.17036	0.0376426	IKBKB
NM_002460.1	0.324493	5.51337	0.156054	IRF4
NM_001766.3	0.325493	5.71117	0.180764	CD1D
NM_002117.4	0.326776	14.5344	0.0232998	HLA-C
NM_006016.4	0.329475	12.3689	0.0579191	CD164
NM_004356.3	0.331663	13.3247	0.00610209	CD81
NM_006419.2	0.336578	2.01398	0.482104	CXCL13
NM_153443.3	0.344018	0.685693	0.625143	KIR3DL3
NM_016557.2	0.344062	2.97469	0.423924	ACKR4
NM_021181.3	0.344711	12.1863	0.130335	SLAMF7
NM_002831.5	0.346568	10.0519	0.0324608	PTPN6
NM_005157.3	0.347679	7.87253	0.0312429	ABL1
NM_000625.4	0.349567	2.94617	0.352547	NOS2
NM_000416.1	0.350603	11.026	0.156054	IFNGR1
NM_004619.3	0.351648	5.24497	0.104927	TRAF5
NM_173799.2	0.352098	3.89358	0.107896	TIGIT
NM_001838.2	0.355541	7.77565	0.389745	CCR7
NM_000448.2	0.359012	2.62331	0.506725	RAG1
NM_002880.2	0.359403	8.98109	0.00123833	RAF1
NM_001778.2	0.362899	11.2837	0.0167419	CD48
NM_001911.2	0.363384	2.39139	0.368161	CTSG
NM_002828.2	0.365969	7.67743	0.00972265	PTPN2
NM_021975.2	0.369351	8.85914	0.0591083	RELA
NM_001114937.2	0.371854	2.6581	0.390169	SH2D1A
NM_001090.2	0.375159	8.6884	0.00190409	ABCF1
NM_016734.1	0.3781	3.1282	0.392001	PAX5
NM_001018017.1	0.382934	4.118	0.130335	MUC1
NM_006092.1	0.383102	6.1564	0.0334901	NOD1
NM_005360.4	0.383397	4.34831	0.180399	MAF
NM_007115.2	0.384147	9.50771	0.408927	TNFAIP6
NM_012452.2	0.385874	1.65405	0.546042	TNFRSF13B
NM_005623.2	0.392593	9.26882	0.646312	CCL8
NM_001066.2	0.392899	9.9765	0.012727	TNFRSF1B
NM_003265.2	0.398288	5.51769	0.291171	TLR3
NM_021138.3	0.401968	6.16637	0.0765087	TRAF2
NM_172138.1	0.40199	2.79414	0.389745	IFNL2
NM_001098175.1	0.409416	4.7237	0.327597	ENTPD1
NM_000660.3	0.411938	11.6042	0.00164696	TGFB1
NM_001007033.1	0.412451	4.56425	0.173262	CLEC6A
NM_001783.3	0.415884	6.96671	0.306158	CD79A
NM_018724.3	0.417723	2.01613	0.480016	IL20
NM_000300.2	0.420777	1.42553	0.339096	PLA2G2A
NM_000383.2	0.425767	1.49558	0.374577	AIRE
NM_148910.2	0.426909	5.08562	0.0376426	TIRAP
NM_002800.4	0.430449	9.66593	0.00819126	PSMB9
NM_000418.2	0.437584	8.97165	0.000367733	IL4R
NM_003640.3	0.438906	6.19502	0.022214	IKBKAP
NM_152942.2	0.443917	3.80215	0.156296	TNFRSF8
NM_001228.4	0.458728	8.36836	0.000629593	CASP8
NM_015259.4	0.462	7.29422	0.008986	ICOSLG
NM_000877.2	0.474506	7.50746	0.114744	IL1R1
NM_002342.1	0.478771	8.89691	0.00249471	LTBR
NM_000063.3	0.483109	9.3503	0.0332425	C2
NM_005514.6	0.485034	15.7889	6.51012e-06	HLA-B
NM_032965.3	0.485997	2.24513	0.350778	CCL15
NM_003855.2	0.489134	2.64874	0.506725	IL18R1
NM_002188.2	0.496476	2.47879	0.0608565	IL13
NM_001770.4	0.51498	3.9345	0.035285	CD19
NM_005755.2	0.522107	5.24715	0.350778	EBI3
NM_002116.5	0.522508	15.737	0.000367733	HLA-A
NM_002118.3	0.524896	11.6714	0.000874013	HLA-DMB
NM_006564.1	0.525415	2.33497	0.200969	CXCR6
NM_016602.2	0.529801	2.36883	0.37074	CCR10
NM_006509.2	0.536503	7.68717	0.00109932	RELB
NM_002162.3	0.546722	7.7101	0.00819126	ICAM3
NM_002988.2	0.555984	5.05797	0.193772	CCL18
NM_000399.3	0.556627	9.09976	0.0298636	EGR2
NM_005419.2	0.559851	10.0684	0.000194503	STAT2
NM_016610.2	0.576552	8.74785	0.00126881	TLR8
NM_005041.3	0.577579	4.94168	0.156113	PRF1
NM_001710.5	0.578988	9.15274	0.102047	CFB
NM_007315.2	0.594593	11.0647	0.00147125	STAT1
NM_003810.2	0.594851	8.27045	0.227806	TNFSF10
NM_003327.2	0.600799	3.40586	0.133074	TNFRSF4
NM_198890.2	0.600925	6.46064	0.019109	ATG16L1
NM_080878.2	0.613155	1.19717	0.334748	ITLN2
NM_000215.2	0.614022	5.1092	0.0326564	JAK3
NM_004585.3	0.616808	7.52058	0.0298636	RARRES3
NM_005531.1	0.626304	9.66456	0.00618997	IFI16
NM_000536.3	0.628735	1.13401	0.399509	RAG2
NM_000395.2	0.638662	7.73685	0.000488579	CSF2RB
NM_002985.2	0.641948	11.8114	0.188552	CCL5
NM_002675.3	0.644137	10.3237	0.00327438	PML
NM_002190.2	0.645961	1.04105	0.504704	IL17A
NM_000450.2	0.654717	4.12361	0.190215	SELE
NM_005018.1	0.656241	3.71346	0.156113	PDCD1
NM_005283.2	0.656848	1.65207	0.347585	XCR1
NM_000593.5	0.659567	10.5543	0.0298636	TAP1
NM_005214.3	0.695277	2.41056	0.0334901	CTLA4
NM_000222.2	0.705017	1.27784	0.220427	KIT
NM_014358.2	0.753398	9.34734	0.0227115	CLEC4E
NM_138621.4	0.755894	6.39365	0.000600445	BCL2L11
NM_018664.2	0.779469	7.64894	0.0324608	BATF3
NM_005214.3	0.801881	2.37932	0.0740998	CTLA4
NM_001400.3	0.829855	3.9008	0.0324608	S1PR1
NM_002164.3	0.868743	9.10918	0.114141	IDO1
NM_000544.3	0.955701	9.96454	0.000367733	TAP2
NM_000064.2	0.9732	7.62289	0.0182344	C3
NM_000588.3	1.00683	1.715	0.0454621	IL3
NM_005533.3	1.02929	9.42474	0.00115255	IFI35
NM_001735.2	1.08388	5.31779	0.000600445	C5
NM_002462.2	1.14068	12.5631	0.000652677	MX1
NM_001572.3	1.14164	8.99347	0.000189145	IRF7
NM_014398.3	1.17874	8.01943	0.170899	LAMP3
NM_006573.4	1.24028	10.1406	6.95606e-05	TNFSF13B
NM_000062.2	1.27059	10.8087	0.000134932	SERPING1
NM_001733.4	1.44487	7.75051	0.000367733	C1R
NM_000880.2	1.68208	1.87642	0.0183963	IL7
NM_002286.5	1.80171	7.34462	0.00564416	LAG3
NM_003641.3	1.95979	10.9344	0.0142576	IFITM1
NM_001734.2	2.04217	8.20503	2.37264e-05	C1S
